# Supplementary material for: Randomized feasibility trial of the Scleroderma Patient-centered Intervention Network hand exercise program (SPIN-HAND)
Source: PeerJ journal article supplement (doi:10.7717/peerj.13471), 2022-08-04
Supplement: Kwakkenbos_PeerJ_Codebook.pdf [file Kwakkenbos_PeerJ_Codebook.pdf]

| Variable Name       | Description                                                   | Values                                                                               |
|---------------------|---------------------------------------------------------------|--------------------------------------------------------------------------------------|
| Group1              | Randomization assignment                                      | 0 = Care as usual<br>1 = SPIN-HAND Program                                           |
| Consent1            | Consent to treatment                                          | 0 = No<br>1 = Yes                                                                    |
| Gender1             | Sex                                                           | 0 = male<br>1 = female                                                               |
| Age1                | Age in years                                                  | Continuous                                                                           |
| Country1            | Country of enrollment                                         | 1 = Canada<br>2 = United States<br>3 = United Kingdom                                |
| Education           | Years of education                                            | Continuous                                                                           |
| Ethnicity_Combined1 | Race/ethnicity                                                | 1 = White<br>2 = Black<br>3 = Other                                                  |
| Marital             | Marital status                                                | 1 = Married<br>2 = Common Law<br>3 = Separated/divorced<br>4 = Widowed<br>5 = Single |
| Mrss1               | Modified Rodnan Skin Score                                    | Continuous                                                                           |
| Smalljoints1        | Small joints contractures                                     | 1 = Negative<br>2 = Positive                                                         |
| Largejoints1        | Large joint contractures                                      | 1 = Negative<br>2 = Positive                                                         |
| Subtype1            | Disease subtype                                               | 0 = Limited subtype<br>1 = Diffuse subtype                                           |
| Tendon1             | Tendon friction rubs                                          | 0 = Negative<br>1 = Positive                                                         |
| Timediagnosis1      | Time since diagnosis in years                                 | Continuous                                                                           |
| Timenonray1         | Time since onset first non-Raynaud's symptom or sign in years | Continuous                                                                           |
| Timeray1            | Time since onset Raynaud's in years                           | Continuous                                                                           |
| Cochintotal1        | Cochin Hand Function Scale at baseline                        | Continuous                                                                           |
| Cochintotal2        | Cochin Hand Function Scale at 3 months                        | Continuous                                                                           |
| Prfuntot1           | PROMIS-29 Physical Function T-score at baseline               | Continuous                                                                           |
| Prfuntot2           | PROMIS-29 Physical Function T-score at 3 months               | Continuous                                                                           |
| Prfatiguetot1       | PROMIS-29 Fatigue T-score at baseline                         | Continuous                                                                           |
| Prfatiguetot2       | PROMIS-29 Fatigue T-score at 3 months                         | Continuous                                                                           |

|             |                                                 |                                                                                                                                                                  |
|-------------|-------------------------------------------------|------------------------------------------------------------------------------------------------------------------------------------------------------------------|
| Prdeptot1   | PROMIS-29 Depression T-score at baseline        | Continuous                                                                                                                                                       |
| Prdeptot2   | PROMIS-29 Depression T-score at 3 months        | Continuous                                                                                                                                                       |
| Pranxtot1   | PROMIS-29 Anxiety T-score at baseline           | Continuous                                                                                                                                                       |
| Pranxtot2   | PROMIS-29 Anxiety T-score at 3 months           | Continuous                                                                                                                                                       |
| Prpaintot1  | PROMIS-29 Pain Interference T-score at baseline | Continuous                                                                                                                                                       |
| Prpaintot2  | PROMIS-29 Pain Interference T-score at 3 months | Continuous                                                                                                                                                       |
| Prrolestot1 | PROMIS-29 Social Roles T-score at baseline      | Continuous                                                                                                                                                       |
| Prrolestot2 | PROMIS-29 Social Roles T-score at 3 months      | Continuous                                                                                                                                                       |
| Prsleeptot1 | PROMIS-29 Sleep T-score at baseline             | Continuous                                                                                                                                                       |
| Prsleeptot2 | PROMIS-29 Sleep T-score at 3 months             | Continuous                                                                                                                                                       |
| Promis291   | PROMIS-29 Pain intensity at baseline            | Continuous                                                                                                                                                       |
| Promis292   | PROMIS-29 Pain intensity at 3 months            | Continuous                                                                                                                                                       |
| Mobility1   | EQ-5D Mobility at baseline                      | 1 = level 1 (no problems)<br>2 = level 2 (slight problems)<br>3 = level 3 (moderate problems)<br>4 = level 4 (severe problems)<br>5 = level 5 (extreme problems) |
| Mobility2   | EQ-5D Mobility at 3 months                      | 1 = level 1 (no problems)<br>2 = level 2 (slight problems)<br>3 = level 3 (moderate problems)<br>4 = level 4 (severe problems)<br>5 = level 5 (extreme problems) |
| Selfcare1   | EQ-5D Self-care at baseline                     | 1 = level 1 (no problems)<br>2 = level 2 (slight problems)<br>3 = level 3 (moderate problems)<br>4 = level 4 (severe problems)<br>5 = level 5 (extreme problems) |
| Selfcare2   | EQ-5D Self-care at 3 months                     | 1 = level 1 (no problems)<br>2 = level 2 (slight problems)<br>3 = level 3 (moderate problems)<br>4 = level 4 (severe problems)<br>5 = level 5 (extreme problems) |
| Activities1 | EQ-5D Usual Activity at baseline                | 1 = level 1 (no problems)<br>2 = level 2 (slight problems)<br>3 = level 3 (moderate problems)<br>4 = level 4 (severe problems)                                   |

|             |                                         |                                                                                                                                                                  |
|-------------|-----------------------------------------|------------------------------------------------------------------------------------------------------------------------------------------------------------------|
|             |                                         | 5 = level 5 (extreme problems)                                                                                                                                   |
| Activities2 | EQ-5D Usual Activity at 3 months        | 1 = level 1 (no problems)<br>2 = level 2 (slight problems)<br>3 = level 3 (moderate problems)<br>4 = level 4 (severe problems)<br>5 = level 5 (extreme problems) |
| Pain1       | EQ-5D Pain/discomfort at baseline       | 1 = level 1 (no problems)<br>2 = level 2 (slight problems)<br>3 = level 3 (moderate problems)<br>4 = level 4 (severe problems)<br>5 = level 5 (extreme problems) |
| Pain2       | EQ-5D Pain/discomfort at 3 months       | 1 = level 1 (no problems)<br>2 = level 2 (slight problems)<br>3 = level 3 (moderate problems)<br>4 = level 4 (severe problems)<br>5 = level 5 (extreme problems) |
| Anxiety1    | EQ-5D Anxiety/depression at baseline    | 1 = level 1 (no problems)<br>2 = level 2 (slight problems)<br>3 = level 3 (moderate problems)<br>4 = level 4 (severe problems)<br>5 = level 5 (extreme problems) |
| Anxiety2    | EQ-5D Anxiety/depression at 3 months    | 1 = level 1 (no problems)<br>2 = level 2 (slight problems)<br>3 = level 3 (moderate problems)<br>4 = level 4 (severe problems)<br>5 = level 5 (extreme problems) |
| Health1     | EQ-5D visual analogue scale at baseline | Continuous                                                                                                                                                       |
| Health2     | EQ-5D visual analogue scale at 3 months | Continuous                                                                                                                                                       |
