# Supplementary material for: Randomized feasibility trial of the Scleroderma Patient-centered Intervention Network hand exercise program (SPIN-HAND)
Source: PeerJ. 2022 Aug 4;10:e13471. doi: 10.7717/peerj.13471 (PMC9357372; doi:10.7717/peerj.13471)
Supplement: Supplemental Information 4 — Raw data for review purposes. We are in the process of setting up a repository with McGill University to make the data available there upon publication of the paper (with a doi link) [file peerj-10-13471-s004.xlsx]

## Sheet: Sheet1
group1	consent1	gender1	age1	country1	education	ethnicity_combined1	marital	mrss1	smalljoints1	largejoints1	subtype1	tendon1	timediagnosis1	timenonray1	timeray1	cochintotal1	cochintotal2	prfuntot1	prfuntot2	prfatiguetot1	prfatiguetot2	prdeptot1	prdeptot2	pranxtot1	pranxtot2	prpaintot1	prpaintot2	prrolestot1	prrolestot2	prsleeptot1	prsleeptot2	promis291	promis292	mobility1	selfcare1	activities1	pain1	anxiety1	health1	mobility2	selfcare2	activities2	pain2	anxiety2	health2
1	1	0	64	1	14	1	1	5	1	1	1	0	20.9167	19.9167	20.9167	7	2	48	48	57	46	41	49	40.3	40.3	53.9	41.6	51.9	64.2	50.5	54.3	3	2	2	1	1	2	2	81	1	1	1	2	1	82
0	0	0	75.4167	1	13	1	1	3	1	1	0	0	26.5	26.5	28.3333	58	43	34.4	40.4	48.6	48.6	53.9	41	55.8	40.3	53.9	53.9	58.3	51.9	52.4	54.3	7	4	4	2	2	4	1	40	4	2	2	3	1	69
0	0	0	61.4167	1	12	1	1	7	2	1	0	0	14.0833	14.5	14.6667	10	11	45.3	48	46	46	41	41	40.3	48	58.5	65.2	50	48.1	50.5	57.9	7	8	1	1	2	3	2	80	1	2	1	3	1	50
1	0	0	41.9167	1	20	1	5	21	1	1	1	0	1.58333	2.75	2.75	6	7	48	48	46	46	51.8	41	48	51.2	41.6	52	58.3	58.3	37.5	41.1	2	2	1	1	2	2	1	70	2	1	1	2	1	70
1	0	0	77.5	1	13	1	1	8	1	1	0	1	10.9167	18.9167	10.9167	13	8	48	48	55.1	55.1	41	60.5	63.4	63.4	41.6	55.6	51.9	44.2	46.2	43.8	1	7	1	1	1	2	2	88	1	1	2	2	2	79
1	1	0	57.1667	1	14	1	1	2	1	1	0	0	17.75	24.4167	33.4167	18	11	35.6	36.7	75.8	75.8	57.3	55.7	55.8	55.8	66.6	61.2	37.3	42.3	73.3	54.3	8	6	2	1	2	3	3	60	2	1	2	3	1	59
0	0	0	69.5833	1	12	1	1	4	1	1	0	0	20.0833	25.0833	48	30	33	41.8	41.8	48.6	57	62.2	58.9	59.5	59.5	66.6	62.5	42.3	42.3	46.2	57.9	6	6	1	1	2	3	2	60	1	2	2	3	2	61
1	0	0	31	1	18	2	5	26	1	1	1	1	8.91667	9.58333	9.41667	42	37	22.9	29.1	75.8	66.7	57.3	41	59.5	55.8	66.6	61.2	37.3	37.3	52.4	54.3	9	9	3	5	4	4	2	20	4	4	4	4	2	15
0	0	0	53	2	14	2	1	34	2	2	1		18.9167	19.4167	18.9167	12	10	41.8	41.8	66.7	60.7	53.9	49	59.5	59.5	63.8	63.8	44.2	42.3	54.3	57.9	7	7	1	1	3	3	2	61	1	1	2	3	2	41
1	1	0	26	2	16	1	5	11	1	1	0	0	9.91667	10.9167	11.5	12		56.9		60.7		69.4		71.2		41.6		48.1		63.8		1		1	2	2	2	4	29
1	0	1	66.9167	2	12	1	3	0	1	1	0	0	15.8333	16.1667	16.1667	5	20	36.7	32.1	46	51	41	41	40.3	40.3	55.6	55.6	51.9	37.3	54.3	54.3	3	2	3	2	3	2	1	80	4	3	4	3	1	60
1	0	0	65.6667	2	14	1	1	6	1	1	1	0	8.66667	10.0833	8.91667	10	18	56.9	56.9	33.7	43.1	41	41	40.3	40.3	41.6	52	58.3	55.8	41.1	41.1	3	6	1	1	1	3	1	92	1	1	1	4	1	80
1	1	0	76.6667	2	15	1	1	0	1	1	0	0	14.9167	14.9167	51.9167	49	53	35.6	33.3	62.7	60.7	58.9	58.9	63.4	57.7	62.5	61.2	48.1	51.9	57.9	57.9	7	7	2	1	1	3	2	62	2	1	2	3	3	61
0	0	1	66.6667	2	14	1	1	11	1	1	0	0	0.75	1.08333	1.41667	26	26	40.4	41.8	58.8	64.6	65.7	69.4	63.4	71.2	63.8	55.6	38.8	27.5	57.9	57.9	4	2	2	2	3	2	3	68	1	2	3	3	4	31
1	1	0	51.3333	2	22	3	1	6	1	1	1	0	8	8.91667	8.5	13	23	41.8	40.4	48.6	48.6	41	41	48	40.3	55.6	53.9	48.1	44.2	48.4	50.5	2	3	2	2	2	2	2	89	2	2	2	2	1	79
1	1	0	59.9167	2	16	1	1	10	1	1	0	1	4.5	4.58333	4.58333	5	3	56.9	56.9	43.1	48.6	41	41	40.3	48	41.6	41.6	64.2	64.2	48.4	43.8	0	1	1	1	1	1	1	98	1	1	1	1	1	93
0	0	0	56.8333	2	14	1	1	20	1	1	1		4.25	4.25	5.41667	56	49	32.1	33.3	57	51	49	41	53.7	53.7	75.6	75.6	27.5	27.5	43.8	43.8	8	6	3	4	4	4	1	50	4	3	4	3	1	41
1	1	0	63	1	13	1	2	13	2	2	1	1	11	10.75	10.75	33	36	43.4	41.8	33.7	48.6	41	41	40.3	40.3	55.6	55.6	58.3	64.2	54.3	54.3	3	3	1	1	1	2	1	80	2	2	2	3	1	79
1	0	1	62.5	1	9	1	1	7	1	1	1	0	2.58333	2.91667	3.08333	32		39.1		66.7		69.4		69.3		57.1		40.5		52.4		6		2	2	3	3	4	41
1	0	0	56.6667	1	12	1	1	18	2	1	1	1	8.16667	9.33333	10.9167	57		36.7		60.7		55.7		55.8		66.6		44.2		56.1		7		3	3	3	3	2	52
0	0	0	73.1667	1	13	1	1	18	2	2	0	1	15.9167	25.3333	32.4167	14	23	36.7	36.7	58.8	64.6	41	60.5	51.2	57.7	55.6	55.6	40.5	35.7	57.9	52.4	5	6	2	2	3	3	2	60	3	2	3	3	2	50
1	1	0	58.6667	3	13	1	1		2	1	0		20.9167	27.9167	27.9167	16		26.9		75.8		62.2		55.8		75.6		27.5		61.7		8		4	1	4	3	2	50
1	1	0	69.75	3	15	1	5		2	2	0	0	23.9167	23.9167	25.9167	24	35	41.8	43.4	57	58.8	41	41	40.3	40.3	59.9	69.7	42.3	42.3	43.8	41.1	4	9	1	2	2	3	1	40	1	1	3	4	1	40
0	0	0	24.0833	3	16	1	5		2	1	1	0	17.9167		18.9167	11		32.1		64.6		62.2		63.4		61.2		34		32		4		4	3	4	2	2	55
1	1	0	60.3333	3	19	1	1		2	2	1	1	10.25	10.9167	10.9167	45		36.7		64.6		63.9		67.3		66.6		37.3		54.3		8		3	3	3	4	3	70
0	0	0	62.9167	3	13	1	1		1	1	0		12.9167	14.9167	13.9167	16	11	45.3	43.4	60.7	60.7	41	49	40.3	40.3	63.8	63.8	55.8	44.2	56.1	61.7	6	6	2	2	2	3	2	61	1	2	2	3	1	68
0	0	0	68.1667	3	11	1	5		2	2	1		2.41667	4	4	11	11	33.3	33.3	64.6	64.6	62.2	62.2	61.4	59.5	66.6	65.2	34	37.3	61.7	57.9	7	7	3	2	3	3	2	60	3	1	3	3	1	69
0	0	0	74.25	3	18	1	4		2	1	0		3.91667	3.58333	4.25	4	9	41.8	35.6	69	71.6	49	49	55.8	51.2	55.6	58.5	40.5	35.7	48.4	41.1	3	3	2	2	2	2	1	40	2	2	3	2	2	60
0	0	0	33.4167	3	22	3	1		1	1	0	0	5.91667	13.9167	21.9167	6		37.9		64.6		73.3		75.4		68		40.5		73.3		10		2	1	2	4	1	20
1	1	0	59.75	3	12	1	1		1	1	0	0	2.91667	3.91667	8.91667	9		45.3		62.7		57.3		63.4		61.2		44.2		59.8		4		2	2	2	2	2	57
0	0	0	72.25	2	19	3	3	33	1	1	1	1	3.5	3.58333	3.58333	15	4	56.9	56.9	48.6	46	49	41	55.8	40.3	55.6	52	44.2	51.9	56.1	54.3	4	3	1	1	2	2	2	81	1	1	1	2	1	70
1	0	0	46.1667	2	17	1	1	5	1	1	0	0	5	6.33333	6.33333	30		40.4		64.6		41		61.4		61.2		42.3		56.1		5		2	2	3	3	3	60
1	1	0	29.8333	2	19	1	5	8	1	1	1	1	11.9167	11.9167	12.9167	36		32.1		53.1		57.3		59.5		61.2		37.3		48.4		2		2	3	2	1	2	72
1	1	0	61.3333	3	15	1	4	2	1	1	0	0	6.91667	9.66667	16.6667	31	37	39.1	40.4	58.8	55.1	53.9	55.7	51.2	53.7	63.8	59.9	44.2	44.2	54.3	54.3	7	5	3	3	3	2	1	70	2	3	3	2	1	69
1	1	0	68.5	3	12	1	1	2	1	1	0	0	4.91667	9.41667	9.41667	15		29.1		58.8		41		40.3		66.6		42.3		73.3		8		3	2	3	3	1	62
1	0	0	54.1667	3	12	1	2	0	1	1	0	0	8.08333	12.4167	13.4167	12	18	36.7	35.6	75.8	75.8	62.2	55.7	59.5	53.7	68	63.8	37.3	42.3	61.7	59.8	8	7	3	2	3	4	2	60	2	2	2	3	1	70
1	1	1	61.75	2	19	1	1	44	2	2	1	1	2.16667	2.66667		6		41.8		62.7		55.7		57.7		55.6		51.9		52.4		3		3	1	2	2	2	75
0	0	0	70	2	18	1	5	27	2	1	1	1	1.83333	2		31		32.1		62.7		57.3		65.3		62.5		37.3		66		6		3	2	4	3	3	40
0	0	0	27.8333	2	18	2	5	15	1	1	1	0	2.91667	3.75	3.75	24		40.4		64.6		41		40.3		55.6		44.2		54.3		3		1	1	2	1	1	70
0	0	0	50.5833	2	16	1	1	19	1	2	1	1				14	21	37.9	40.4	64.6	69	57.3	57.3	65.3	57.7	61.2	55.6	44.2	44.2	46.2	54.3	7	5	2	1	3	3	3	63	1	1	2	3	3	49
